# Supplementary material for: Water-induced fluorescence enhancement of lead-free cesium bismuth halide quantum dots by 130% for stable white light-emitting devices
Source: Royal Society of Chemistry journal article supplement (doi:10.1039/c9nr10075j), 2020-01-01
Supplement: c9nr10075j1.pdf [file c9nr10075j1.pdf]

## SUPPORTING INFORMATION

# Water-induced fluorescence enhancement of lead-free cesium bismuth halide quantum dots by 130% for stable white light-emitting devices

Zhuang-Zhuang Ma,<sup>a</sup> Zhi-Feng Shi,<sup>\*a</sup> Lin-Tao Wang,<sup>a</sup> Fei Zhang,<sup>a</sup> Di Wu,<sup>a</sup> Dong-Wen Yang,<sup>\*a</sup> Xu Chen,<sup>a</sup> Yu Zhang,<sup>b</sup> Chong-Xin Shan<sup>a</sup> and Xin-Jian Li<sup>a</sup>

<sup>a</sup>Key Laboratory of Materials Physics of Ministry of Education, School of Physics and Microelectronics, Zhengzhou University, Daxue Road 75, Zhengzhou 450052, China

<sup>b</sup>State Key Laboratory on Integrated Optoelectronics, College of Electronic Science and Engineering, Jilin University, Qianjin Street 2699, Changchun 130012, China

---

\*Author to whom correspondence should be addressed. Electronic mail: shizf@zzu.edu.cn; yangdw@zzu.edu.cn

## EXPERIMENTAL SECTION

**Materials.** CsCl ( $\geq 99.9\%$ ), CsBr ( $\geq 99.9\%$ ), PbCl<sub>2</sub> ( $\geq 99.9\%$ ), PbBr<sub>2</sub> ( $\geq 99.9\%$ ), and CsI ( $\geq 99.9\%$ ) were purchased from Xi'an Polymer Light Technology Corp. BiCl<sub>3</sub> (99%), BiBr<sub>3</sub> (99%), and BiI<sub>3</sub> (99%) were purchased from Alfa Aesar. Oleic acid (OA, 90%), n-octylamine (OLAM, 99%), and oleylamine (OAm, 90%) were purchased from Sigma-Aldrich. N,N-dimethylformamide (DMF), ethanol anhydrous, toluene, and DMSO were purchased from Beijing Chemical Reagent Co., Ltd., China. All the chemicals were used without further purification.

**Synthesis of Cs<sub>3</sub>Bi<sub>2</sub>X<sub>9</sub> QDs.** Typically, colloidal Cs<sub>3</sub>Bi<sub>2</sub>Br<sub>9</sub> QDs were fabricated by the ligand-assisted recrystallization method, which is described in the following section. In a typical synthesis of Cs<sub>3</sub>Bi<sub>2</sub>Br<sub>9</sub> QDs, 0.36 mmol CsBr and 0.24 mmol BiBr<sub>3</sub> were dissolved in 3 mL of DMSO, then 30  $\mu$ L of OLAM and 0.6 mL of OA were added into the mixture solution to form a clear precursor solution at RT. Then, 0.5 mL of the precursor solution was injected into a toluene solution (5 mL) under vigorous stirring. After a reaction for 15 min, a crude solution emitting strong blue under UV light irradiation was obtained. Then the crude solution was centrifuged at 10000 rpm for 10 min to discard the large particles. After that, a bright blue colloidal Cs<sub>3</sub>Bi<sub>2</sub>Br<sub>9</sub> QDs solution was obtained for characterization and anion exchange. The solid powders of Cs<sub>3</sub>Bi<sub>2</sub>Br<sub>9</sub> QDs were obtained by gradient centrifugation of the crude solution at 5000 rpm and then 10000 rpm both for 10 min. Cs<sub>3</sub>Bi<sub>2</sub>Cl<sub>9</sub> QDs and Cs<sub>3</sub>Bi<sub>2</sub>I<sub>9</sub> QDs were fabricated by varying the precursors and solvents following a similar method. For adjusting the emission wavelength of the Cs<sub>3</sub>Bi<sub>2</sub>X<sub>9</sub> QDs, an anion-exchange technology was employed, in which CsCl or CsI dissolved in DMSO was quickly added into the as-prepared colloidal Cs<sub>3</sub>Bi<sub>2</sub>Br<sub>9</sub> QDs solution.

**Water Treatment of Cs<sub>3</sub>Bi<sub>2</sub>Br<sub>9</sub> QDs.** 1 mL deionized water was introduced into a 4 mL cuvette containing 2 mL of Cs<sub>3</sub>Bi<sub>2</sub>Br<sub>9</sub> QDs toluene solution. The cuvette was placed at room temperature for 0.5 h as an optimum treatment time and then the supernatant Cs<sub>3</sub>Bi<sub>2</sub>Br<sub>9</sub> QDs toluene solution

was separated from the water. Further, the supernatant is centrifuged and redispersed in toluene to obtain stable and high PLQY  $\text{Cs}_3\text{Bi}_2\text{Br}_9/\text{BiOBr}$  nanocomposites.

**Synthesis of  $\text{CsPbBr}_3$  and  $\text{CsPbCl}_{1.5}\text{Br}_{1.5}$  QDs.** 0.2 mmol  $\text{PbBr}_2$ , 0.2 mmol  $\text{CsBr}$ , 0.5 mL OA, and 0.25 mL OAm were added into the DMF (5 mL) to form a precursor solution. 0.5 mL of the precursor solution was injected into 5 mL of toluene under vigorous stirring. After a reaction of 15 min, a strong green colloidal  $\text{CsPbBr}_3$  QDs solution was obtained. For the synthesis of  $\text{CsPbCl}_{1.5}\text{Br}_{1.5}$  QDs, the method is similar to the synthesis of  $\text{CsPbBr}_3$  QDs.

**Fabrication of WLEDs.** The dried blue-emissive  $\text{Cs}_3\text{Bi}_2\text{Br}_9/\text{BiOBr}$  nanocomposites were firstly mixed with the commercial yellow-emissive  $(\text{Ba}, \text{Sr})_2\text{SiO}_4:\text{Eu}^{2+}$  phosphors at a mass ratio of 1.5:1 in a polydimethylsiloxane encapsulant (Dow Corning, SYLGARD 184 Silicone Elastomer) to obtain a homogeneous mixture. Then, the mixtures were put in a vacuum chamber to get rid of the bubbles inside. Finally, the mixtures were dropped onto the window of the UV-LED chips (365 nm) and then solidified in a vacuum oven at 40 °C for 60 min and at 110 °C for 100 min sequentially, and finally the WLED was obtained. The thickness of the dried mixture films was measured by a micrometer caliper to be about 500  $\mu\text{m}$ .

**Characterizations.** The microstructures of the as-synthesized perovskite QDs were characterized using a high-resolution TEM (JEOL, JEM-3010). The crystallinity characterizations of  $\text{Cs}_3\text{Bi}_2\text{X}_9$  QDs were analyzed by XRD (Panalytical X'Pert Pro). The chemical compositions of the products were analyzed by EDS attached to TEM. The optical properties of the products were measured using a Shimadzu UV-3150 spectrophotometer and steady-state PL spectra (Horiba; Fluorolog-3) with an excitation line of 340 nm. A closed-cycle helium cryostat (Jannis; CCS-100) was used to carry out the PL measurement at different temperatures. The absolute PL quantum yield of the  $\text{Cs}_3\text{Bi}_2\text{Br}_9$  QDs solution was measured by using a fluorescence spectrometer (Horiba; FluoroMax-4) with an integrated sphere (Horiba;

Quanta- $\phi$ ). A pulsed NanoLED (Horiba; 340 nm) was used to conduct the transient-state PL measurement. Note that the measured absorption spectrum, PL spectrum, and time-resolved PL decay curve of the  $\text{Cs}_3\text{Bi}_2\text{X}_9$  QDs at RT were performed with the colloidal solution. The emission performance of the WLEDs were carried out by using a Keithley 2400 source and a PR650 SpectraScan spectrophotometer (Photo Research) in air and at RT.

**Computational methods.** The first-principle calculations were carried out by using plane-wave pseudopotential approach within density functional theory as implemented in the Vienna Ab-initio Simulation Package (VASP). The electronic wave-functions are expanded in plane-wave basis sets with kinetic energy of 400 eV. The  $k$ -point meshes with grid spacings of  $2\pi \times 0.02 \text{ \AA}^{-1}$  or less is used for electronic Brillouin zone integration. The electron-ion interactions is described by means of projected augmented wave pseudopotentials with  $5s^25p^66s$  for Cs,  $6s^26p^3$  for Bi,  $4s^24p^5$  for Br as valence electrons. The crystal structures of  $\text{CsPbBr}_3$ ,  $\text{CsPb}_2\text{Br}_5$ ,  $\text{Cs}_3\text{Bi}_2\text{Br}_9$  were fully relaxed until the total force on each atom was less than  $0.01 \text{ eV/\AA}$ . The diffusion barriers were calculated using nudged elastic band (NEB) method in conjunction with the climbing image method.

## **Lifetime calculation from time-resolved PL decay results**

In this case, the time-resolved PL decay curves of Cs<sub>3</sub>Bi<sub>2</sub>Br<sub>9</sub> QDs were fitted with a biexponential function of time ( $t$ ):

$$R(t) = K_1 \exp(-t/\tau_1) + K_2 \exp(-t/\tau_2) \quad (1)$$

where  $K_1$  and  $K_2$  are the distribution coefficients and,  $\tau_1$  and  $\tau_2$  stand for the characteristic PL decay lifetimes. The average lifetime ( $\tau_{ave.}$ ) was estimated with the  $K_i$  and  $\tau_i$  values from the fitted curve data according to the following equation:

$$\tau_{ave.} = \sum K_i \tau_i^2 / \sum K_i \tau_i, i = 1, 2 \quad (2)$$

**Optical images of the  $\text{Cs}_3\text{Bi}_2\text{X}_9$  QDs solutions ( $\text{X} = \text{Cl}_x\text{Br}_y\text{I}_{1-x-y}$ ,  $0 \leq x, y \leq 1$ )**

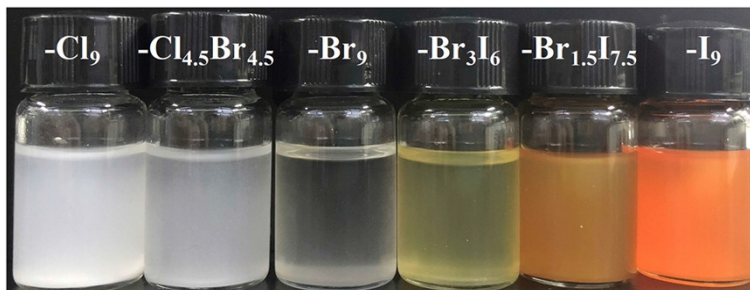

**Figure S1. Optical images of the colloidal  $\text{Cs}_3\text{Bi}_2\text{X}_9$  QDs solution under ambient light with different halide compositions ( $\text{X} = \text{Cl}_x\text{Br}_y\text{I}_{1-x-y}$ ,  $0 \leq x, y \leq 1$ ).**

## Investigations on the XRD patterns of the $\text{Cs}_3\text{Bi}_2\text{X}_9$ QDs ( $\text{X} = \text{Cl}, \text{Br}, \text{and I}$ )

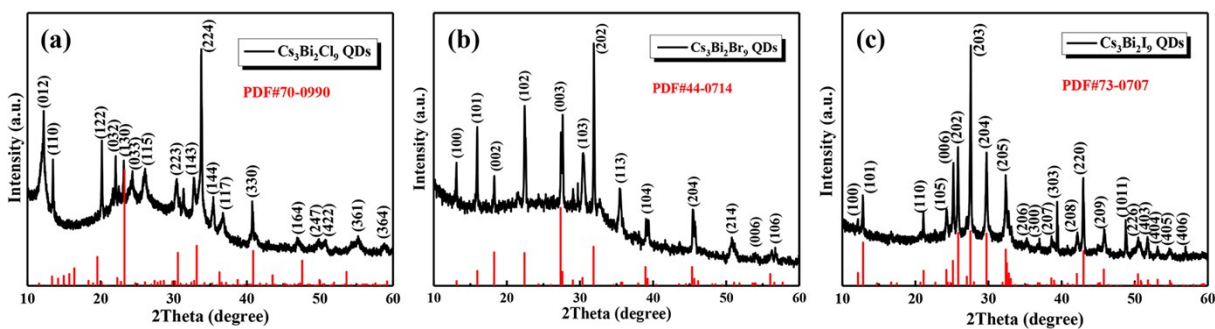

Figure S2. XRD patterns of (a)  $\text{Cs}_3\text{Bi}_2\text{Cl}_9$ , (b)  $\text{Cs}_3\text{Bi}_2\text{Br}_9$ , and (c)  $\text{Cs}_3\text{Bi}_2\text{I}_9$  QDs, respectively.

## Investigation on the thermal stability of the Cs<sub>3</sub>Bi<sub>2</sub>Br<sub>9</sub> QDs

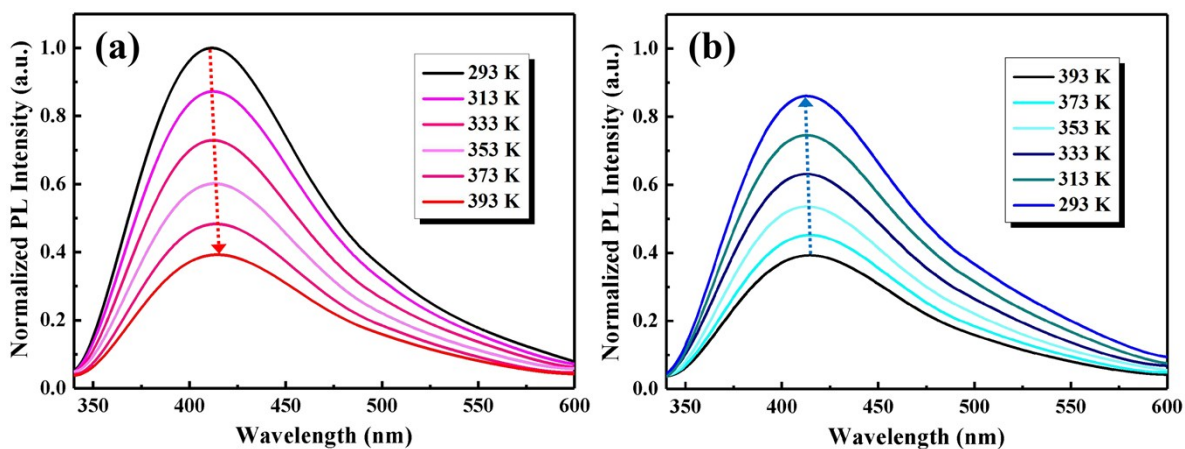

**Figure S3. Normalized PL spectra of the Cs<sub>3</sub>Bi<sub>2</sub>Br<sub>9</sub> QDs film at different temperature over (a) the heating cycle and (b) cooling cycle.**

As shown in Figure S3a, the normalized PL intensity of Cs<sub>3</sub>Bi<sub>2</sub>Br<sub>9</sub> QDs films decreases by ~60% with the temperature rises from 293 to 393 K. As the temperature decreases from 393 to 293 K, the PL intensity can recover to ~86% of the initial value, as shown in Figure S3b.



## Comparison on the thermal stability of the $\text{Cs}_3\text{Bi}_2\text{Br}_9$ and $\text{CsPbBr}_3$ QDs

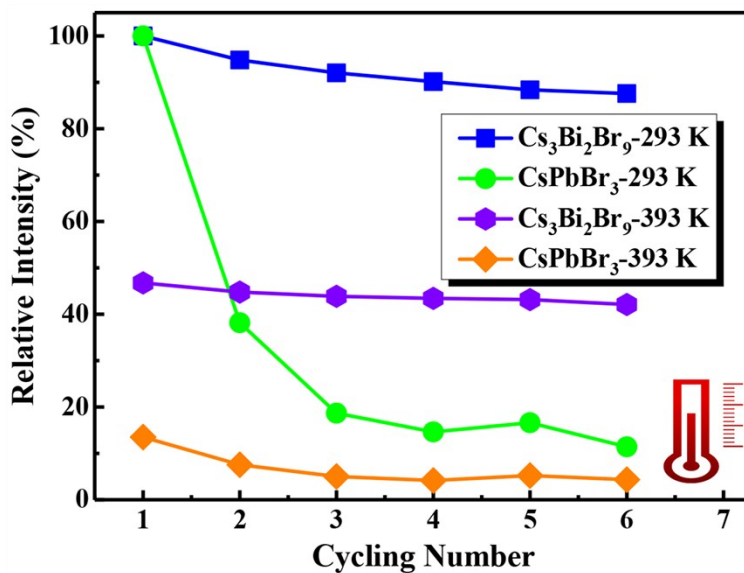

Figure S4. Integrated PL intensity of the  $\text{Cs}_3\text{Bi}_2\text{Br}_9$  and  $\text{CsPbBr}_3$  QDs at two representative temperature points (293 and 393 K) over six heating/cooling cycling measurements.

## Comparison on the photostability of the $\text{Cs}_3\text{Bi}_2\text{Br}_9$ and $\text{CsPbBr}_3$ QDs

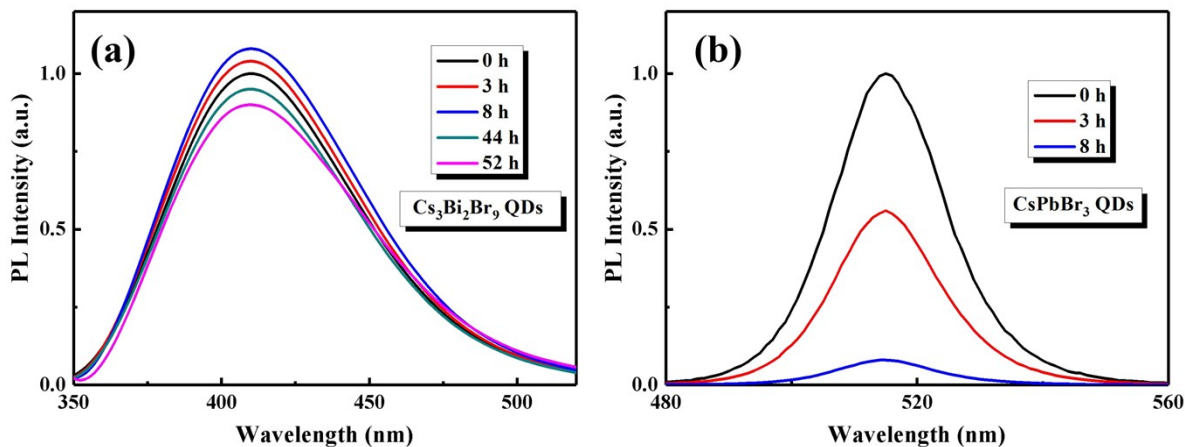

**Figure S5. Normalized PL spectra of (a) the  $\text{Cs}_3\text{Bi}_2\text{Br}_9$  and (b)  $\text{CsPbBr}_3$  QDs solutions irradiated at different time periods under UV light (365 nm, 30 W).**

As shown in Figure S5a, the PL intensity of the  $\text{Cs}_3\text{Bi}_2\text{Br}_9$  QDs is slightly increased after a continuous exposure to UV light for 8 h, and then decreases to ~90% of the initial value. While, the PL intensity of  $\text{CsPbBr}_3$  QDs rapidly decays under UV light irradiation, and only ~10% remains after a much shorter period of 8 h, as shown in Figure S5b.

## Comparison on the moisture stability of the $\text{Cs}_3\text{Bi}_2\text{Br}_9$ and $\text{CsPbBr}_3$ QDs

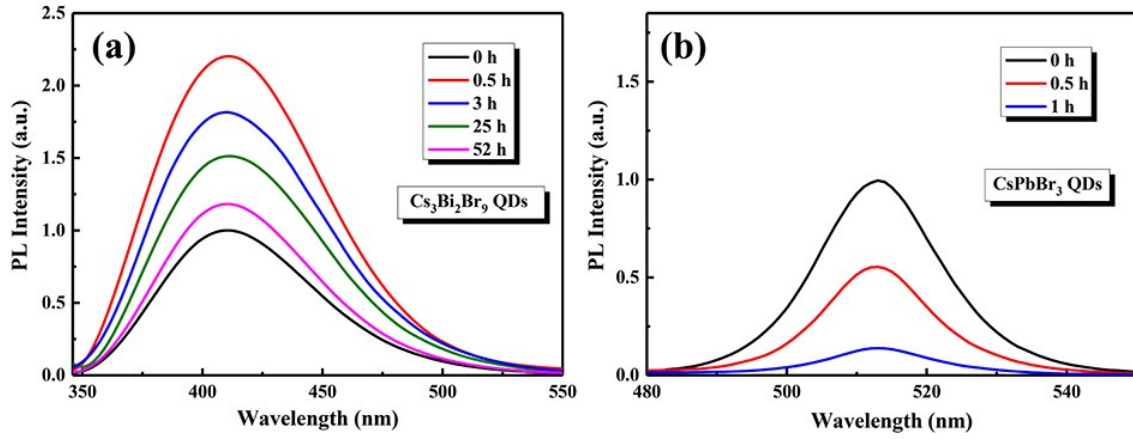

**Figure S6. PL spectra of (a) the  $\text{Cs}_3\text{Bi}_2\text{Br}_9$  and (b)  $\text{CsPbBr}_3$  QDs solutions measured at different time periods after adding deionized water.**

As shown in Figure S6a, the PL intensity of the  $\text{Cs}_3\text{Bi}_2\text{Br}_9$  QDs is rapidly increased by  $\sim 130\%$  in the initial period, and then decreases to  $\sim 115\%$  of the initial value after 52 h continuous test. While, the PL intensity of  $\text{CsPbBr}_3$  QDs drops rapidly, and only  $\sim 5\%$  remains after 1 h test, as shown in Figure S6b.

## Investigation on the moisture stability of CsPbBr<sub>3</sub> and Cs<sub>3</sub>Bi<sub>2</sub>Br<sub>9</sub> QDs after water treatment

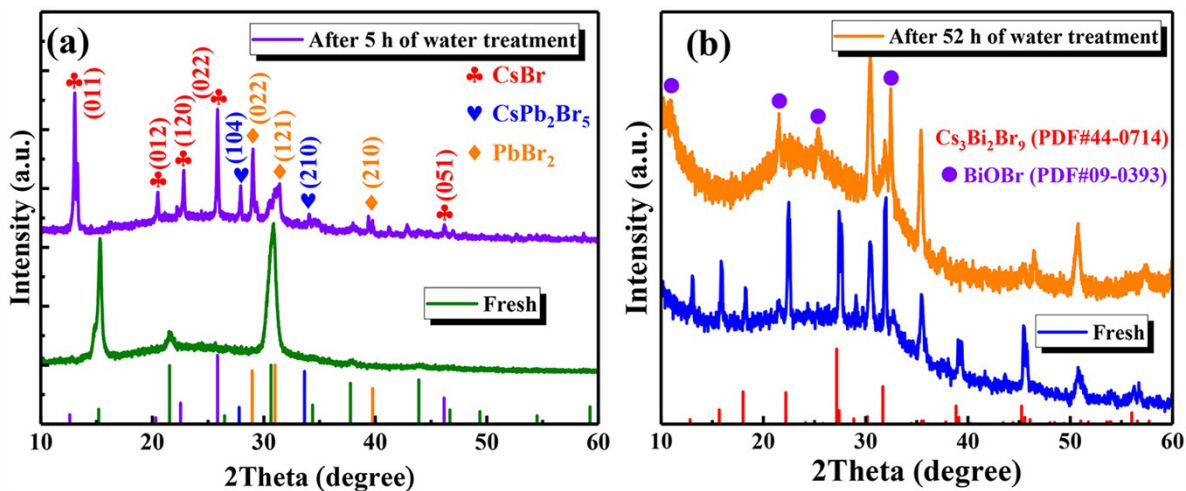

Figure S7. Evolution of the XRD patterns of (a) the CsPbBr<sub>3</sub> and (b) Cs<sub>3</sub>Bi<sub>2</sub>Br<sub>9</sub> QDs after water treatment.

## Analysis of the chemical composition of the Cs<sub>3</sub>Bi<sub>2</sub>Br<sub>9</sub> QDs

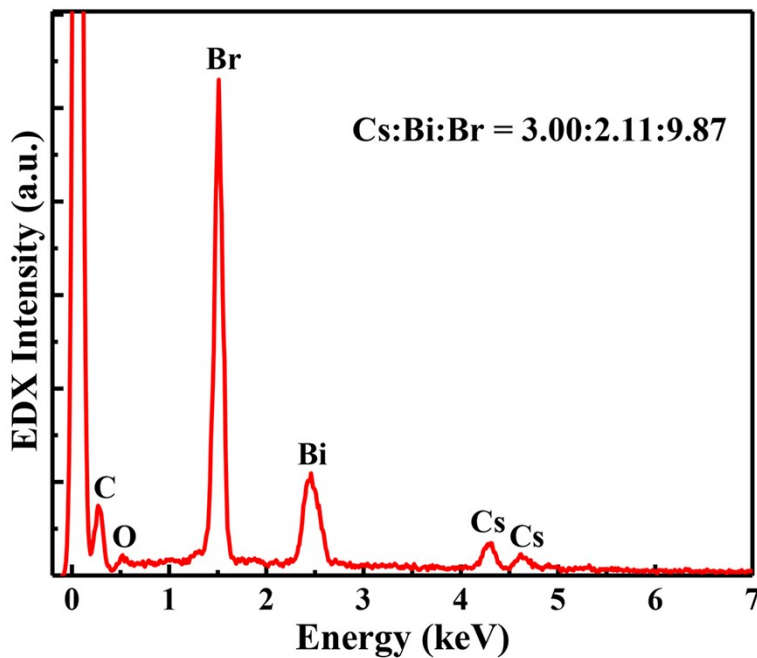

**Figure S8. EDS spectra of the Cs<sub>3</sub>Bi<sub>2</sub>Br<sub>9</sub> QDs.**

Figure S8 presents the EDS spectrum of the as-prepared Cs<sub>3</sub>Bi<sub>2</sub>Br<sub>9</sub> QDs. No other chemical impurities were detected in the resulting sample except for the well-known compositions, and the quantitative analysis of EDS spectrum gives the quantitative atomic ratio (%) of Cs:Bi:Br is 3.00:2.11:9.87, which is much higher than their stoichiometric ratio. Thus, the obtained Cs<sub>3</sub>Bi<sub>2</sub>Br<sub>9</sub> QDs showed BiBr<sub>x</sub>-rich composition.

Comparison on the optical properties of the  $\text{Cs}_3\text{Bi}_2\text{X}_9$  QDs before and after water treatment

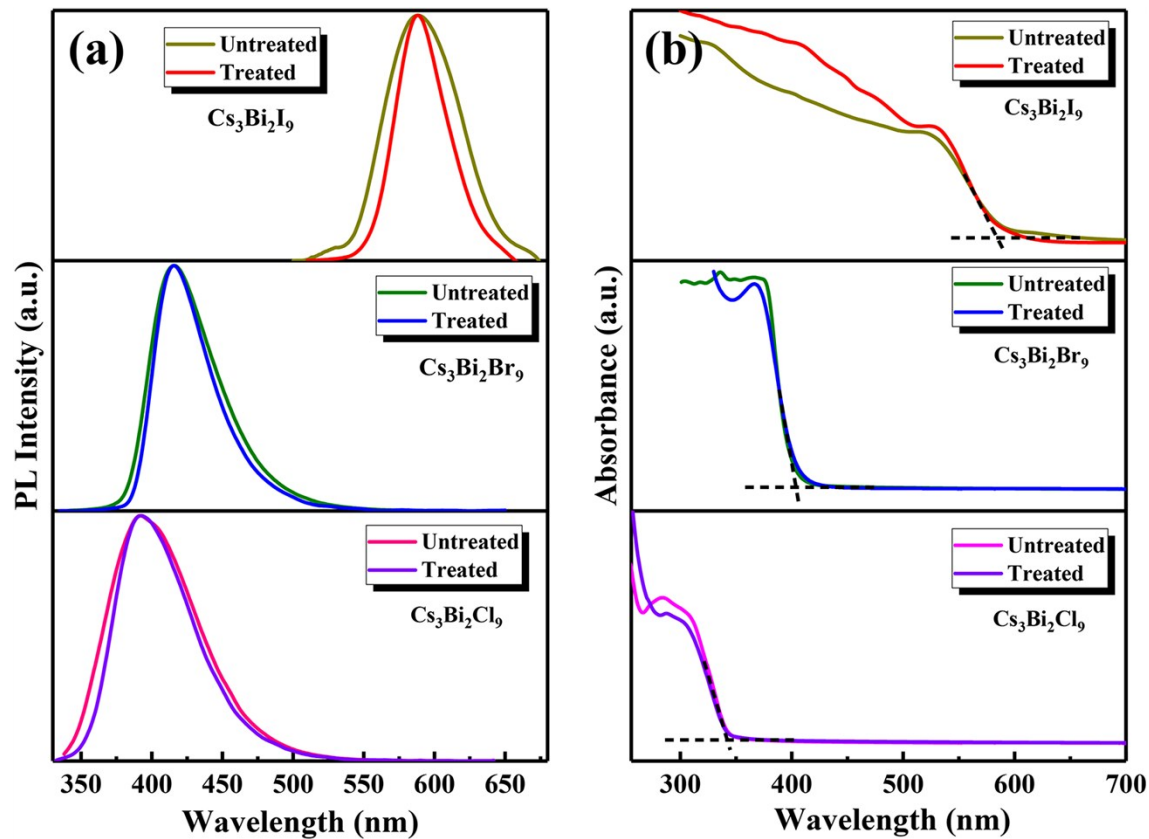

Figure S9. (a) PL and (b) absorption spectra of different  $\text{Cs}_3\text{Bi}_2\text{X}_9$  QDs before and after water treatment.

## PL spectra of two emission components for WLED fabrication

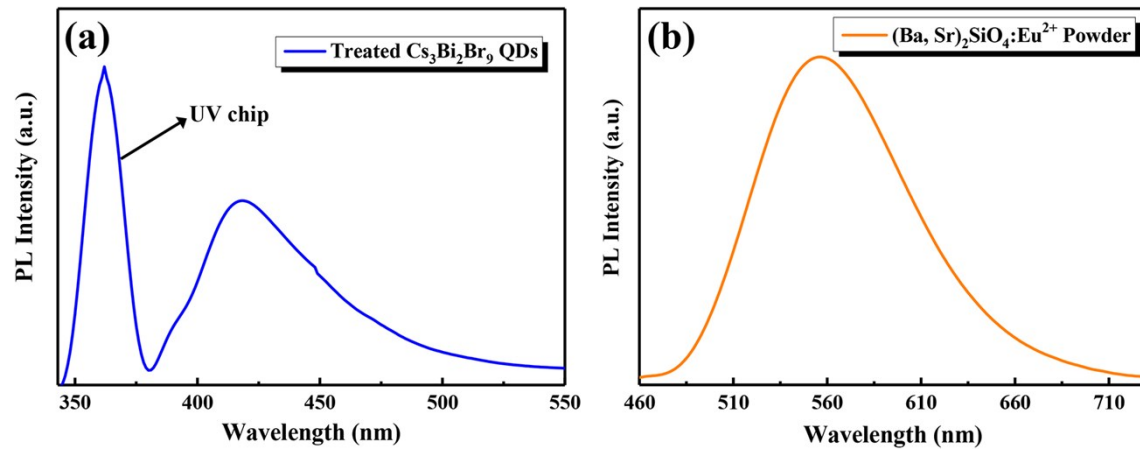

Figure S10. PL spectra of (a) the  $\text{Cs}_3\text{Bi}_2\text{Br}_9$  QDs and (b)  $(\text{Ba, Sr})_2\text{SiO}_4:\text{Eu}^{2+}$  powder under UV chip (365 nm) excitation.

## Shift of the CIR color coordinates of the reference WLED

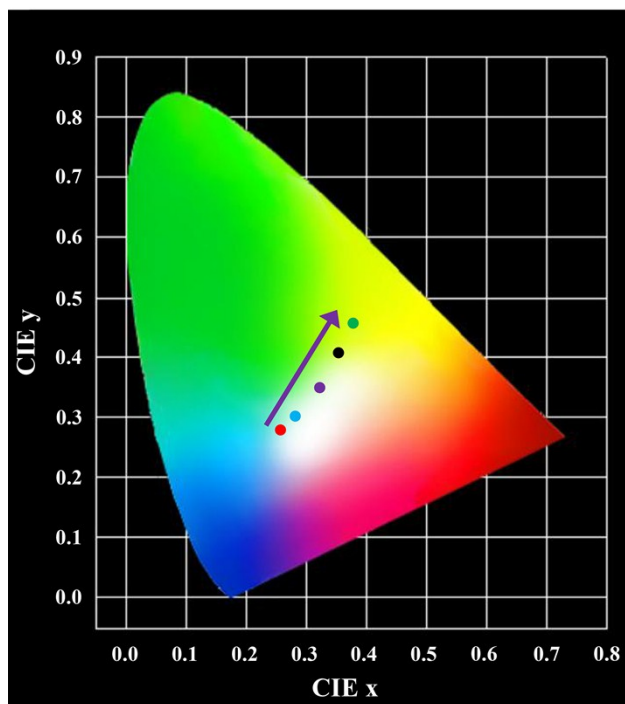

Figure S11. CIE color coordinates of the reference WLEDs at different running time.



**Table S1 Detailed data of PL emission peak and FWHM of the Cs<sub>3</sub>Bi<sub>2</sub>X<sub>9</sub> QDs****(X = Cl<sub>x</sub>Br<sub>y</sub>I<sub>1-x-y</sub>, 0 ≤ x, y ≤ 1)**

| QDs composition                                                     | Emission peak (nm) | FWHM (nm) |
|---------------------------------------------------------------------|--------------------|-----------|
| Cs <sub>3</sub> Bi <sub>2</sub> Cl <sub>9</sub>                     | 393                | 60        |
| Cs <sub>3</sub> Bi <sub>2</sub> Cl <sub>4.5</sub> Br <sub>4.5</sub> | 401                | 63        |
| Cs <sub>3</sub> Bi <sub>2</sub> Br <sub>9</sub>                     | 411                | 48        |
| Cs <sub>3</sub> Bi <sub>2</sub> Br <sub>7.5</sub> I <sub>1.5</sub>  | 425                | 65        |
| Cs <sub>3</sub> Bi <sub>2</sub> Br <sub>6</sub> I <sub>3</sub>      | 442                | 64        |
| Cs <sub>3</sub> Bi <sub>2</sub> Br <sub>4.5</sub> I <sub>4.5</sub>  | 472                | 68        |
| Cs <sub>3</sub> Bi <sub>2</sub> Br <sub>3</sub> I <sub>6</sub>      | 493                | 74        |
| Cs <sub>3</sub> Bi <sub>2</sub> Br <sub>1.5</sub> I <sub>7.5</sub>  | 540                | 84        |
| Cs <sub>3</sub> Bi <sub>2</sub> I <sub>9</sub>                      | 590                | 66        |

**Table S2 Summary of the bond length and distortion angle of CsPbBr<sub>3</sub> and**

**Cs<sub>3</sub>Bi<sub>2</sub>Br<sub>9</sub>**

| Bond length of<br>Pb-Br | Distort angle of<br>Br-Pb-Br | Bond length of<br>Bi-Br        | Distort angle of<br>Br-Bi-Br |
|-------------------------|------------------------------|--------------------------------|------------------------------|
| 2.93 Å                  | 180°                         | Bi-Br1=2.75 Å<br>Bi-Br2=2.96 Å | 174°                         |

**Table S3 Detailed CIE (x, y) and CCT (K) data of the reference WLED at different running time**

| working time (h) | CIE (x, y)   | CCT (K) |
|------------------|--------------|---------|
| 0                | 0.277, 0.293 | 10048   |
| 0.1              | 0.284, 0.303 | 8952    |
| 0.3              | 0.324, 0.352 | 5862    |
| 0.5              | 0.345, 0.406 | 5155    |
| 0.8              | 0.361, 0.452 | 4849    |
